# Supplementary material
Source: PubMed Central journal article supplement (PMC3594269)
Supplement: cc-12-684-s01.pdf [file cc-12-684-s01.pdf]

## **Supplemental Material to:**

**Yiping Huang, Dafna Kisselman, Darya Kizub,  
Rafael Guerrero-Preston and Edward A. Ratovitski**

**Phospho- $\Delta$ Np63 $\alpha$ /microRNA feedback regulation in  
squamous carcinoma cells upon cisplatin exposure**

**2013; 12(4)**

**<http://dx.doi.org/10.4161/cc.23598>**

**<http://www.landesbioscience.com/journals/cc/article/23598>**

## Supplemental Methods

**Preparation of the nuclear extracts and DNA/protein binding.**  $5 \times 10^9$  cells (~140mg of total protein) were incubated with control medium or 10 $\mu$ g/ml cisplatin for 12h and the nuclear pellets were prepared and further incubated at a 250:1 ratio with poly (deoxyinosinic-deoxycytidylic) acid in 20mM HEPES-KOH (pH7.9), 1.5mM MgCl<sub>2</sub>, 100mM NaCl, 0.1% (v/v) Nonidet P-40, and protease inhibitor mixture (Calbiochem) at room temperature for 10min, as described elsewhere.<sup>31</sup> Resulting nuclear lysates were then incubated with MagnaBind streptavidin beads with the 25nmol bead-bound complementary double-stranded oligonucleotides (50bp) corresponding to the specific regions of the specific promoters for miR-181a-5p, miR-519a-3p, miR-374a-5p, miR-630 and miR-885-3p encompassing TP63 responsive element (Fig. 2, Fig. S1-S5). Double-stranded oligonucleotides were conjugated with MagnaBind™ streptavidin beads (Pierce).<sup>31</sup> The concentration of conjugated DNA was 6fmol/ $\mu$ g of MagnaBind streptavidin beads.<sup>31</sup> DNA/protein bead-bound complexes were washed with the binding buffer and bound proteins eluted using 100mM Tris-HCl (pH 7.3), 5mM EDTA, 0.05% SDS, and 8M urea at room temperature for 30min.<sup>31</sup>

**iTRAQ labeling and fractionation by the strong cationic exchange (SCX) chromatography.** For iTRAQ labeling, 200 $\mu$ g of eluted protein from large-scale DNA pull-downs were first subjected to gel-assisted digestion.<sup>29</sup> Trypsin digestion (20:1 (w/w) protein : trypsin) of gel samples were performed in 25mM TEABC at 37°C for 16h. Peptides were extracted from the gel using 50% acetonitril containing 5% (v/v) formic acid, vacuum dried, and reconstituted in 30 $\mu$ l of 25mM TEABC. To label peptides with the iTRAQ reagents (Applied Biosystems), one unit of labeling reagent (defined as the amount of reagent required to label 100 $\mu$ g of protein) was reconstituted in 70 $\mu$ l of ethanol. Products isolated from SCC-11 cells exposed to 10 $\mu$ g/ml cisplatin were labeled with

iTRAQ (115, 116 and 117), whereas products isolated from SCC-11M cells exposed to cisplatin were labeled with iTRAQ (113 and 114), respectively.<sup>29</sup> After incubation of specific mixes at room temperature for 1h, labeled peptides were pooled, resuspended in buffer A, and the specific mixes were fractionated by SCX chromatography on an Agilent HPLC system using a PolySulfoethyl A column.<sup>29</sup>

**Liquid chromatography (LC)/double mass spectrometry (MS/MS) analysis.** Each SCX fraction were re-dissolved in 0.2% trifluoroacetic acid, desalted and separated on a C18 column with an 8 $\mu$ m emitter tip using 5-40% B (90% acetonitrile in 0.1% formic acid) gradient over 60min at 300nl/min. Eluting peptides were sprayed directly into an LTQ Orbitrap Velos mass-spectrometer (ThermoScientific) through an 1 $\mu$ m emitter tip at 1.6kV. Survey scans (full ms) were acquired from 350-1800 m/z with up to 10 peptide masses (precursor ions) individually isolated with a 1.2Da window and fragmented (MS/MS) using a collision energy of 45s and 30s dynamic exclusion.<sup>29</sup> Precursor and the fragment ions were analyzed at 30,000 and 7,500 respectively.

**Data analysis.** The MS/MS spectra were extracted and searched against the RefSeq 40 database and against the Swiss-Prot sequence database v54.2 using the MASCOT v2.2.1 program (Matrix Science) through Proteome Discoverer software (v1.1, Thermo Scientific). The peptides with a confidence threshold 5% False Discovery Rate (FDR) were identified based on a concatenated decoy database search). To calculate average protein ratios, the ratios of quantified unique iTRAQ peptides were weighted according to their peak intensities.<sup>29</sup> A protein's ratio is the median ratio of all unique peptides identifying the protein at a 5% FDR. The combination of two approaches was used to normalize the iTRAQ ratios: normalization by total protein (i.e. the average of all the ratios). Only proteins identified with ratios >1.25 or <0.75 were considered as potential targets.

## Supplemental Legends

**Figures 1-5.** Schematic representation of the selected microRNA gene promoter sequences. Putative recognition sequences for tumor protein (TP) 53, TP63, sterol responsive element binding factor (SREBF), and nuclear factor (NF) -Y and other transcription factors are shown as bolded and shadowed boxes, while primers used for ChiP-PCR are underlined. Recognition sequences (responsive elements) defined using the web-based database: TFSEARCH: Searching Transcription Factor Binding Sites (version 1.3) ([mbs.cbrc.jp/research/db/TFSEARCH.html](http://mbs.cbrc.jp/research/db/TFSEARCH.html)). The following promoters depicted: S1 –miR-181a-5p; S2 – miR-519a-3p; S3- miR-374a-5p; S4 – miR-630; S5 – miR-885-3p.

**Tables S1-S5. iTRAQ analysis of proteins bound to TP63 responsive element cognition sequence located in microRNA promoters induced by exposure of sensitive SCC-11 and resistant SCC-11M cells to cisplatin.** Quantitative iTRAQ analysis was performed in triplicate. Protein complexes from the cells exposed to control medium were labeled with iTRAQ-113, or -114, while protein complexes from the cells exposed to cisplatin were labeled with iTRAQ-115, -116, or -117. Only proteins identified with iTRAQ ratios >1.3 or <0.7 were considered as potential differential interactors. S1 –miR-181a-5p; S2 – miR-519a-3p; S3- miR-374a-5p; S4 – miR-630; S5 – miR-885-3p.



-400 **CTAAGGTAAT** TCTGTTT**AAT TT**CTGTATAA G**CTATATAACA TAATGCTTGC**  
**SRY/OCT1** **CdxA** **XFD-1/TP63**  
 -350 **TTACTATACG TGTAACAATA TT**TAA**AATTAT AAGATATTG**T TTGGATTTTA  
**TP63** **SOX5/CdxA** **CdxA/GATA3**  
 -300 TACCACAAAG TACTTTG**AAT AACAA**ATTGT CCCTGTCTTT AACAGTGAGA  
**CdxA/SRY**  
 -250 **TAATTCAT**C TCTGGAACTA GC**CCAAT**ATC GGCC**ATGTTT TTGCTTGATG**  
**GATA1** **NF-Y** **FOXM1/TP63/OCT1**  
 -200 **AAACAGG**TCC TTTTCTCTCA TACAATGTGA TGTGGA**GGTT TGCCAAACTC**  
**TP63/OCT1** **C/EBPβ**

**Figure S2. Mir-519a-3p promoter sequence**

-2000 **GTTTTGTTTG GTTGGTTATT TTT**GAGACAA **GGTCTGGCTC TGTCATCCAG**  
**SRY/FOXM1 C/EBP/CdxA** **ZBTB6** **TP63**  
 -1950 **G**CTGGAGTGT AGTGGTGTGA TCTCAGCTCA CTGCAACCTC CACCCCCGAC  
 -1900 CTAAGCCTAC TGAATTA **GTG TCTACAGGCA CGCACTACCA CACCTGG**CTC  
**SREBF** **TP63**  
 -1850 ACTTTTGTAT TTTTTGTA**CA** **CATGGGGTTT CACATG** ATTG CCGGGGCTGG  
**E-box** **TP53**  
 -1800 TCTCAAAC**T**C **CTGTGCTCAG GTGATCCTCC** CATCACGGCC TCCT**AAAGTG**  
**TP63** **USF** **SREBF** **Nkx2**  
 -1750 **CTGGAATTAG AGGTG**TGAGC CGCCACGC**CC CACCTGT**ACT TGTGTATCTC  
**POU3F1** **USF**  
 -1700 TGTT**CAAATG** TTACTGAGGA GCTTTTACAG **CGTAACCTGT** GGTCTATCCT  
**E-box**  
 -1650 GGAA**AATGTT TGTGTGTGAG ACAATGTACA** TTCTTCAACA TCTTAGATTG  
**FOXD3** **C/EBP**  
 -1600 CAGTTTGGAT GCTCCCGT**CA GGACTGTGTG TCCCTG**TGCT GGGACT**CAAG**  
**TP63** **E-box**  
 -1550 **TG**AACACTGG GCTCTCCATC CATTGCTGTT GTCTAGAAAT CCAGC**CCAAT**  
**NF-Y**  
 -1500 TCTCTTGGGT **AAATAT**GAGG TATGTGTAGT AGGCATTGCT TTTTCTTTCT  
**CdxA**  
 -1450 GGAGACAAAG CT**CAGGAGGA TTGCCCTTG** AT**AAACAAA**G CTAACCTGCT  
**TP63** **SRY**  
 -1400 GATTCTTTGA AGCAAGGAAC TGGAGATGGT CCTTTTAGGG GTTTATATTC  
 -1350 TGGATTCCAG AAAACATGCA AA**CAGGACCA ATAAATGCGT G**CTTATTTTT  
**PBX1/TP63**  
 -1300 GTGTCTGTTT TAACCTGGTC AAGGAAAATT CCAACAAAAA ATCCACGATG  
 -1250 CTGGAG**CATG AAGATCTCAG G**CTGTGTCCC TCTAGAGGGA AGCGCTTTCT  
**TP53**  
 -1200 GTTGTCTG**AA AGAAAAGAAA AT**GGTTCCTT TTAGAGTGTT ACGCTTTGAG  
**SRY/ RUNX1**  
 -1150 AAAAGCATCG CTGATCTTGG TAACACATTT GCAGAGAATG **CTTATAATCA**  
**OCT1**  
 -1100 **GACG**TGGATG ATGTTGAAGT TTTGC**GTTTG TTTTGTTTTG TTTTT**TTTCC  
**OCT1** **FOXD3** **FOXD3**  
 -1050 TAGACAGGGT GTCTGCTGCC **CAACTG**AGAG TGCGGTGGCA CTTCCAACCT  
**E-box**  
 -1000 AGACCTCTTG GGT**TTAAGTG** GCCCTCTATT TT**GGGATAGA GT**CTTGCTCT  
**Nkx2** **IKZF1**  
 -950 GTGGCC**CTGG CTGGAGTGCA GTGTCAGG**AA CTCTGCTCAC TGCGACCTCT  
**TP63**  
 -900 **GCCTCCTAGG TTCAAGCGAT** TCTCTTGCTT CAGCCTCCTG **AGCAGCTGGG**  
**Ik-2/E-box**  
 -850 **ATTA**CGGGCA TGTGCCACCA TGCCTGGCTA ATTTTTGTAT TTTTTATTAT  
 -800 TT**ATTAT**TT **ATTAT**TTTT GAGACAGAGT CTCGCTCTGT CACCCAGGCT

**CdxA CdxA**  
 -750 **GAAGTG**CAGT GGTGCGATCT TGGCTCACCG CAACCTCTAC CTCCACCTC  
**Nkx2**  
 -700 AGCCTCC**TGA ACAGCTGTCT** C**CAGGCGTGC ACCACCACAC CTGG**CTAACT  
**MyoD/E-box TP63 E-box**  
 -650 TCTGTATTTG TTTTACAGT**C ATGGTTTCAC CATG**TTGCC GGGCTCATCT  
**TP53**  
 -600 TGAACTCCTG AGC**TCAAGTG ATCCTCCC**GC CTCAGCCTCC TAAAGTGCTG  
**Nkx2/E-box/SREBF**  
 -550 TGAGCCACCG TGTCCCAACA GTACTTGTGT GTTTCCGTTT AAATTGTATT  
 -500 GAGGAGCTTT TACAGCATAG CCTGTGGTCT CTCCGGG**AGA ATGTTTTTG**T  
**FOXD3**  
 -450 TTACGACAAT GTATATTCTT CAACATCGTA GATTCCATTT TGGATGCCCT  
 -400 **CATTGGGACT GT**GTGTC**CCT GTACTGGAAC TCAAG**TGAA**C ACTTG**GCTCA  
**IKZF1 TP63/Nkx2 E-box**

**Figure S3. Mir-374a-5p promoter sequence**

-2250 TTATCGAAGA GACTTCTAGA ATTAGTTATT TGTCAAAAGA TTTGAACATT  
 -2200 ATAA**AGAATT GGCATATTTA CTTT**TCAA**AA AATT**AATGTC AGTTTTTGTA  
**OCT1/FOXM1 CdxA**  
 -2150 CCCAGTCC**ATT TAG**GTA**CTTA TAAAAA**AT**TGT TTTGCTTT**T TTTTTTTTT**G**  
**CdxA TATA FOXM1**  
 -2100 **CTGACTCCAT TTGTA**AAATGA ATGAATGATA TCTCTGTGGG GTTTTTTTTGT  
**TFAP1 YY1**  
 -2050 **TTTTGTTTTT TTC**TGAGA**CA GGCTCTCCCC CTG**TCGCCTA GG**CTGGAGTA**  
**FOXD3 TP63 TP63**  
 -2000 **CAGTGGCGTG ATTATG**GCTC ACTGAAGCCT **CCAAT**TCCAG GGCTCCAGAG  
**TP63 SREBF NF-Y**  
 -1950 ATCCTCCTAC CTCAGCCT**CC TGAGTAGCGG GAGTACAGG TGTGTGCC**ACC  
**TP63 E-box/TCF3**  
 -1900 **ATGTCCAGCT AATTTTTTAA** TTTTTTTTGT **AGAGATGGAG**T TTTGCCATGT  
**GATA1**  
 -1850 TGCT**CAGGCT TGTCTTGAAC TCCTGG**GC**TC AAGTGATTTT C**CCACCCCGG  
**TP63 Nkx2 SREBF**  
 -1800 CT**TCCCAAAA** **TGCTGGGATT ACAGGGGTGA GCCACCATAC CTGG**CCG**ATA**  
**STAT IKZF1 TP63**  
 -1750 **TCTTTGTTTT** GTGATACAGT TCTCTGATTA TTAGTGAGGC TGGACTTTTA  
**FOXM1**  
 -1700 GAT**CTTAATT AC**TAGC**TCTT ATTTCCTT**TT GTGAATTATT CAATTTGTGC  
**Nkx2 FOXM1**  
 -1650 CTGAATGTT**A TTTG**TAAGTT G**CAAATG**TCG TTTGTTGCAG ATATGCTCCC  
**CdxA E-box**  
 -1600 **AGTAATATTT GTTG** CCATTG **AGTCTGAAGA A**ATGTTTGCA ATTCCAAATA  
**CdxA FOXM1 C/EBPβ**  
 -1550 TAACTGCTGT GTGGATACAT GTCTGGTTCT T**GGTAGCCAT TTTGAGAT**AA  
**YY1**  
 -1500 **CATTTG**TCTG ACCTCTATCT TATTTTTTGT TTTATTTTTTA GAGTGGAGGT  
**E-box**  
 -1450 CTTGCC**CATG CTGGTCTCGA ACTCCTGGGC**TCAAGCAATC TTTCTGCCTC  
**TP53**  
 -1400 CGCCTCCCAA AG**TGCTGGGA TTAC**AGGCAT AAGCCACCTT ACCCAGCCTT  
**IKZF1**  
 -1350 GTC**TGACCTT TAAACA**GAAA TCCATTTCTT TTTATCTAAA AGGAAAGCAC  
**NR2F2**  
 -1300 TTTTGAGTAC TGTACAACAG TGGTGCTTCC TGGCC**CTGGG CATGGGGAGA**  
**TP63/MZF1**  
 -1250 **AGACAGG**GCA ACATTTTG**TC CCTAATGAGA A**ACTAATTTA GACAAGAAAC  
**TP63 OCT1**  
 -1200 **AAAACA**GCGG TCCCTTCTCC CCCAT**CCAAT** CAGGGACTGG TCTTATTTTA  
**SRY NF-Y**





**v-Myb**

-800 **TT**CTTAGATT TCATTGTAA**C TGGACTGTT CAGG**TTGCCCA GAGGGAAAGA  
**TP63**

-750 **ACATTCC**TAA TTCTAATAAA ATAAACTTTT ATTTTGTAT TCCATTAGTT  
**HSF1**

-700 **ACTTATGTTT ATT**TTTATAG TTAAAAAATG ACTAAAGGTG GCTAATAGCC  
**FOXM1**

-650 ACCCGTATTA TGTGCCTTAT TCACTGTTCC **CACTTAATAT AAAATGTCAA**  
-600 AAATTGGTTG TTTCTTTGCA GGGAACTGTG **AATGAGCCCA TTCCCCAA****C**  
**STAT**

-550 ATTTAACTT**G GTTAATGAAG CT**TTTCAGAGC ATTTTCTGAA AGATTTCCAA  
**OCT1**

-500 TTTCTGCATC TCAGA**TATTG AATTAAATT GTTTGT**GTTG TAACAGTGAT  
**POU3F1 FOXD3**

-450 **ACAAAAATGT TCAATAGCTC** TTTGAATGCC ACTTT**TTTTA AA**GAAAATAC  
**TATA**

-400 **TTTTAAA**GTC ATTCTTAGCT AACCTCAAAA CTCCTTTACA TTACTTTCAT  
**TATA**

-350 TTTAGCTCAC **TCTTAAAGCT GATACTGTTA** TATAGGGATG AAGGGAGAGT  
-300 TTTCTTAAAG **AAGGTCCCAA AGTTGAAGAT** CGTTTGTCTAT TGATACTCTG  
-250 GC**CAAGTCCA GGTTTTAGGA CATG**TTAATT TACTCTTATT TGGATCTGTA  
**TP53**

**Figure S5. Mir-885-3p promoter sequence**

-2350 AGACTGGGTT **CCAAT**CCCAA CTCTACTCCT TAGCCAGGGA CCCCCAACAA  
**NF-Y**

-2300 GCTTCCCCC CTTTCTGATT ATAGCCCCAG CTCATGAG**GT TGTGTTGAAA**  
**C/EBPβ**

-2250 **TC**TGGAACCT CCAGAAATGT CCA**TTTCGCC** CTCTCATCCT TCATCT**CAAA**  
**E2F E-box**

-2200 **TG**TCTCCCCT TTCCCACCTC TCTGGGCTAC CCCCTTCCCTC TTCATCATCC  
-2150 AACTCCTCCC TACCTTCAG**C CTGCAGCAGC CTGCCTCCCC CAGGGGGTGT**  
**TP63 c-Rel**

-2100 **TCC**TTGATTA GTTTCTTCCC CAGTGTCTG AACTCCCTGC ATAACAGC**CA**  
-2050 **TTTG**GAT**GCT CATTTTTATG** **CA**CAACCAGA CACCATGGGC CCTTTACATC  
**E-box OCT1**

-2000 **AGCGGGGA**GG CCTTGC**TGGG CTTCCA**GTC TGATGATC**CT TGAGGAACAA**  
**MZF1 c-Rel TP63**

-1950 **CACAGAGAGA CCAGG**CTGGG GG**CATTGTG GTGT**CGTTAT GGTGGTTGAG  
**TP63 E-box ATF2**

-1900 AAAGCCCTAG TGTCATCTCA TGCACGTGTTT CAGCTTAGAA GAGGGCAGGA  
-1850 AACACTCCGC TCTGGT**CAGT TG**GTCCAACC ATGCTTGCC TGTGACCCTG  
**E-box**

-1800 GACAGGTCCC TTCACCTCTC TGAGCCTCTG TGTCTGTGTC AGTGCAATGG  
-1750 GGAAGCTGGT GAGGCCTCCA CTGCCTGCC **CACATGGCTG TTGTGGGGAC**  
**E-box/TP53/c-Myb/MZF1**

-1700 **CACAGGCATG CACACGTG**TG ACTGTCCTTT GC**AAACAAA**C CCTGCGGTG  
**TP53 USF/E-box SRY**

-1650 TGAGGTGCTG TATGGTGTGG AAGGAATGTG G**CATCTG**GAG GCAGAATGCC  
**E-box**

-1600 CAGGTTCCAG CCCTCCAACA GCTCCCACTG TGGCCTCTGC CCCTCAGAAC  
-1550 CTCAGTTTCC C**CATCTGACA AGTG**AGGGCA GACCAGCCTT CAGAAAGACT  
**E-box/Nkx2**

-1500 CAAA**TGACCT CA**ACACT**CAG GGCACCAAGG AAATCATCAA AACCATG**CAG  
**ATF2 TP53**

-1450 **GTTTCCCC**TA CCTTCCTACC CTC**CAGGGAC GGACAGG**CAG ACACGAGCCC  
**TCF3 TP53/TP63**

-1400 ATGTCTGGTG TATCT**TCAA CGGG**ACAGAG TAAA**AATATT CAGAAATTG**C  
**v-Myb Oct-1/C/EBPβ**

-1350 AAACATCATAT GTCTGCAGGG C**CAGGTAGG AGAGCACATG** **TCCTTTGGCC**



| Description                                                                                                         | Accession | MW [kDa] | 5: 114/114 | 4/113 | 5: 115/115   | 115/115 | 116/116      | 116/116 | 115/115 | 117/117      | 117/117 | pI    | Coverage | # PS | Pept | Score A3 | coverage | PSM | ptides |
|---------------------------------------------------------------------------------------------------------------------|-----------|----------|------------|-------|--------------|---------|--------------|---------|---------|--------------|---------|-------|----------|------|------|----------|----------|-----|--------|
| Table S1. Proteins interacting with the miR-181a-5p promoter sequence in SCC cells (11/11M) upon cisplatin exposure |           |          |            |       |              |         |              |         |         |              |         |       |          |      |      |          |          |     |        |
| tumor protein p63 [Homo sapiens], TP63                                                                              | 169234657 | 67.9     | 0.989      | 21    | <b>8.854</b> | 10      | <b>7.648</b> | 14      | 1.00    | <b>8.408</b> | 11      | 6.64  | 38.03    | 19   | 7    | 1528.45  | 53.03    | 31  | 12     |
| histone deacetylase 4 [Homo sapiens], HDAC4                                                                         | 153085395 | 117.6    | 0.958      | 19    | <b>2.634</b> | 15      | <b>2.625</b> | 12      | 0.80    | <b>2.503</b> | 9       | 4.93  | 47.31    | 28   | 5    | 1295.89  | 47.31    | 15  | 5      |
| nuclear transcription factor Y subunit alpha [Homo sapiens], NFYA                                                   | 56417679  | 21.5     | 0.971      | 8     | <b>1.970</b> | 8       | <b>1.729</b> | 8       | 0.86    | <b>1.669</b> | 8       | 4.94  | 21.58    | 16   | 3    | 368.26   | 17.37    | 7   | 2      |
| C-terminal-binding protein 1 isoform 1 [Homo sapiens], CTBP1                                                        | 4557497   | 48.5     | 1.205      | 2     | <b>1.781</b> | 2       | <b>1.678</b> | 2       | 1.15    | <b>1.514</b> | 2       | 5.41  | 8.82     | 4    | 2    | 147.51   | 8.82     | 2   | 2      |
| zinc finger and BTB domain-containing protein 2 [Homo sapiens], ZBTB2                                               | 24308241  | 61.0     | 0.909      | 4     | <b>1.718</b> | 4       | <b>1.527</b> | 4       | 0.97    | <b>1.611</b> | 4       | 4.98  | 11.16    | 5    | 8    | 542.97   | 9.13     | 15  | 6      |
| SIN3 homolog B, transcription regulator [Homo sapiens], SIN3B                                                       | 84569981  | 40.8     | 1.089      | 3     | <b>1.492</b> | 3       | <b>1.439</b> | 3       | 1.12    | <b>1.418</b> | 3       | 4.81  | 6.56     | 5    | 1    | 84.39    | 6.56     | 2   | 1      |
| basic helix-loop-helix family, member e41 [Homo sapiens], SHARP1 (BHLHE41)                                          | 19684064  | 53.6     | 1.093      | 1     | <b>1.473</b> | 1       | <b>1.411</b> | 1       | 1.15    | <b>1.401</b> | 1       | 10.36 | 10.14    | 1    | 1    | 19.34    | 5.79     | 1   | 1      |
| CCAAT/enhancer binding protein, beta [Homo sapiens], C/EBPbeta                                                      | 119596035 | 40.1     | 1.137      | 8     | <b>1.446</b> | 8       | <b>1.280</b> | 8       | 0.93    | <b>1.503</b> | 8       | 8.22  | 13.24    | 13   | 7    | 243.76   | 9.00     | 5   | 5      |
| methyl-CpG-binding protein 2 isoform 1 [Homo sapiens], MECP2                                                        | 4826830   | 53.4     | 1.085      | 4     | <b>1.419</b> | 4       | <b>1.673</b> | 4       | 0.97    | <b>1.511</b> | 4       | 4.98  | 11.16    | 4    | 4    | 542.97   | 9.13     | 15  | 6      |
| CCCTC-binding transcriptional repressor, isoform 1 [Homo sapiens], CTCF                                             | 5729790   | 80.8     | 1.048      | 13    | <b>1.303</b> | 14      | <b>1.319</b> | 14      | 1.97    | <b>1.302</b> | 14      | 6.07  | 12.45    | 12   | 7    | 354.67   | 11.45    | 24  | 9      |
| Y-box binding protein 1 [Homo sapiens], YBX1                                                                        | 116283293 | 20.6     | 1.099      | 2     | <b>1.251</b> | 2       | <b>1.224</b> | 2       | 0.81    | <b>1.235</b> | 2       | 5.96  | 1.73     | 3    | 1    | 38.38    | 1.73     | 1   | 1      |
| sex-determining region Y protein [Homo sapiens], SRY                                                                | 383087989 | 23.6     | 0.905      | 18    | <b>1.217</b> | 57      | <b>1.380</b> | 17      | 1.18    | <b>1.263</b> | 17      | 8.84  | 32.74    | 14   | 16   | 2217.01  | 29.89    | 48  | 14     |
| histone acetyltransferase KAT5 isoform 1 [Homo sapiens], KAT5                                                       | 36287069  | 59.6     | 1.078      | 9     | <b>0.591</b> | 10      | <b>0.648</b> | 10      | 1.00    | <b>0.408</b> | 9       | 6.64  | 38.03    | 9    | 4    | 1926.45  | 38.03    | 34  | 9      |
| CREB-regulated transcription activator 2 [Homo sapiens], CRTC2                                                      | 32171215  | 77.5     | 0.916      | 29    | <b>0.581</b> | 29      | <b>0.625</b> | 29      | 0.80    | <b>0.503</b> | 29      | 4.93  | 47.31    | 28   | 5    | 535.89   | 47.31    | 15  | 5      |
| histone-arginine methyltransferase [Homo sapiens] CARM1                                                             | 40288288  | 66.5     | 1.135      | 4     | <b>0.322</b> | 4       | <b>0.348</b> | 4       | 0.81    | <b>0.236</b> | 4       | 8.35  | 13.43    | 6    | 5    | 367.22   | 11.51    | 11  | 4      |

| Description                                                                                                        | Accession | MW [kDa] | 5:114/11 | 4:113 | 5:115/1      | 5:113 | 116/1        | 6:113 | 15/11 | 117/1        | 7:113 | pI    | Coverage | PSM | Pept | Score A3 | coverage | SM | A | rides |
|--------------------------------------------------------------------------------------------------------------------|-----------|----------|----------|-------|--------------|-------|--------------|-------|-------|--------------|-------|-------|----------|-----|------|----------|----------|----|---|-------|
| Table SII. Proteins interacting with the miR-519-3p promoter sequence in SCC cells (1/11M) upon cisplatin exposure |           |          |          |       |              |       |              |       |       |              |       |       |          |     |      |          |          |    |   |       |
| tumor protein p63 [Homo sapiens], TP63                                                                             | 169234657 | 67.9     | 1.046    | 11    | <b>6.854</b> | 10    | <b>7.248</b> | 9     | 1.00  | <b>6.528</b> | 11    | 5.64  | 18.03    | 10  | 4    | 428.45   | 13.03    | 7  | 3 |       |
| histone deacetylase 1 [Homo sapiens], HDAC1                                                                        | 13128860  | 57.9     | 1.040    | 9     | <b>2.634</b> | 5     | <b>2.625</b> | 7     | 0.80  | <b>2.503</b> | 9     | 7.93  | 17.31    | 8   | 3    | 205.89   | 11.31    | 11 | 5 |       |
| SIN3 homolog B, transcription regulator [Homo sapiens], SIN3B                                                      | 84569981  | 40.8     | 1.160    | 5     | <b>2.449</b> | 5     | <b>2.145</b> | 5     | 0.89  | <b>2.116</b> | 5     | 5.29  | 23.94    | 8   | 2    | 194.50   | 23.94    | 3  | 2 |       |
| nuclear transcription factor Y subunit alpha [Homo sapiens], NFYA                                                  | 56417679  | 21.4     | 1.019    | 9     | <b>1.851</b> | 9     | <b>1.801</b> | 9     | 1.08  | <b>1.801</b> | 9     | 5.33  | 28.05    | 10  | 4    | 486.50   | 28.05    | 9  | 4 |       |
| BTG3 associated nuclear protein SMAR1 isoform a [Homo sapiens], BANP                                               | 17986266  | 55.3     | 1.016    | 5     | <b>1.807</b> | 5     | <b>1.406</b> | 5     | 0.89  | <b>1.612</b> | 5     | 5.29  | 23.94    | 8   | 2    | 194.50   | 23.94    | 3  | 2 |       |
| forkhead box D3 [Homo sapiens], FOXD3                                                                              | 6912372   | 52.5     | 0.931    | 1     | <b>1.731</b> | 1     | <b>1.641</b> | 1     | 1.15  | <b>1.440</b> | 1     | 10.36 | 10.14    | 1   | 1    | 19.34    | 5.79     | 1  | 1 |       |
| C-terminal-binding protein 1 [Homo sapiens], CTBP1                                                                 | 4557497   | 48.1     | 0.538    | 1     | <b>1.476</b> | 1     | <b>1.208</b> | 1     | 1.13  | <b>1.515</b> | 1     | 11.41 | 11.72    | 2   | 1    | 78.53    | 11.72    | 1  | 1 |       |
| sex-determining region Y protein [Homo sapiens], SRY                                                               | 383087989 | 23.6     | 0.943    | 1     | <b>1.397</b> | 1     | <b>1.208</b> | 1     | 0.90  | <b>1.309</b> | 1     | 5.76  | 1.86     | 2   | 1    | 62.89    | 1.86     | 1  | 1 |       |
| basic helix-loop-helix family, member e41 [Homo sapiens], SHARP1 (BHLHE41)                                         | 19684064  | 53.6     | 1.243    | 2     | <b>1.368</b> | 2     | <b>1.485</b> | 2     | 0.97  | <b>1.216</b> | 2     | 6.33  | 16.56    | 52  | 6    | 764.68   | 16.56    | 24 | 6 |       |
| CCCTC-binding transcriptional repressor, isoform 1 [Homo sapiens], CTCF                                            | 5729790   | 80.8     | 1.043    | 13    | <b>1.311</b> | 14    | <b>1.219</b> | 14    | 1.10  | <b>1.302</b> | 14    | 6.07  | 16.97    | 50  | 8    | 570.77   | 15.51    | 21 | 7 |       |
| CCAAT/enhancer binding protein, beta [Homo sapiens], C/EBPbeta                                                     | 119596035 | 40.1     | 1.079    | 5     | <b>1.245</b> | 5     | <b>1.370</b> | 5     | 0.85  | <b>1.216</b> | 5     | 5.64  | 5.48     | 8   | 3    | 425.91   | 5.48     | 5  | 3 |       |
| zinc finger and BTB domain-containing protein 2 [Homo sapiens], ZBTB2                                              | 24308241  | 61.2     | 0.755    | 2     | <b>1.232</b> | 2     | <b>1.425</b> | 2     | 1.03  | <b>1.399</b> | 2     | 6.80  | 5.94     | 4   | 2    | 108.46   | 5.94     | 2  | 2 |       |
| CREB-regulated transcription activator 2 [Homo sapiens], CRTC2                                                     | 32171215  | 77.5     | 0.916    | 29    | <b>0.681</b> | 29    | <b>0.625</b> | 29    | 0.80  | <b>0.713</b> | 29    | 4.93  | 47.31    | 38  | 5    | 535.89   | 47.31    | 15 | 5 |       |
| histone acetyltransferase KAT2B [Homo sapiens], KAT2B                                                              | 40805843  | 91.1     | 0.961    | 1     | <b>0.377</b> | 1     | <b>0.550</b> | 1     | 0.98  | <b>0.413</b> | 1     | 6.33  | 3.49     | 3   | 2    | 67.48    | 3.49     | 2  | 2 |       |

| Description | Accession | MW [kDa] | pI | 114/1 | 115/1 | 116/1 | 117/1 | 118/1 | 119/1 | 120/1 | 121/1 | 122/1 | 123/1 | 124/1 | 125/1 | 126/1 | 127/1 | 128/1 | 129/1 | 130/1 | 131/1 | 132/1 | 133/1 | 134/1 | 135/1 | 136/1 | 137/1 | 138/1 | 139/1 | 140/1 | 141/1 | 142/1 | 143/1 | 144/1 | 145/1 | 146/1 | 147/1 | 148/1 | 149/1 | 150/1 |
|-------------|-----------|----------|----|-------|-------|-------|-------|-------|-------|-------|-------|-------|-------|-------|-------|-------|-------|-------|-------|-------|-------|-------|-------|-------|-------|-------|-------|-------|-------|-------|-------|-------|-------|-------|-------|-------|-------|-------|-------|-------|
|-------------|-----------|----------|----|-------|-------|-------|-------|-------|-------|-------|-------|-------|-------|-------|-------|-------|-------|-------|-------|-------|-------|-------|-------|-------|-------|-------|-------|-------|-------|-------|-------|-------|-------|-------|-------|-------|-------|-------|-------|-------|

Table SIII. Proteins interacting with the miR-374a-5p promoter sequence in SCC cells (11/11M) upon cisplatin exposure

|                                                                                                      |           |       |       |    |              |    |              |    |      |              |    |       |       |     |    |         |       |    |   |
|------------------------------------------------------------------------------------------------------|-----------|-------|-------|----|--------------|----|--------------|----|------|--------------|----|-------|-------|-----|----|---------|-------|----|---|
| tumor protein p63 [Homo sapiens], TP63                                                               | 169234657 | 67.9  | 0.985 | 50 | <b>7.518</b> | 51 | <b>7.744</b> | 51 | 0.87 | <b>8.841</b> | 51 | 5.59  | 53.03 | 103 | 7  | 1528.96 | 53.03 | 46 | 6 |
| forkhead box D3 [Homo sapiens], FOXD3                                                                | 6912372   | 52.6  | 1.153 | 17 | <b>1.726</b> | 17 | <b>2.042</b> | 17 | 0.85 | <b>1.351</b> | 17 | 5.38  | 47.45 | 27  | 6  | 528.50  | 40.88 | 11 | 5 |
| sex-determining region Y protein [Homo sapiens], SRY                                                 | 383087989 | 23.6  | 0.800 | 12 | <b>1.587</b> | 12 | <b>1.386</b> | 12 | 1.14 | <b>1.728</b> | 12 | 8.24  | 7.16  | 21  | 4  | 384.84  | 7.16  | 9  | 4 |
| transcription factor AP-4 (activating enhancer binding protein 4) [Homo sapiens], TFAP4              | 4507447   | 43.2  | 0.956 | 1  | <b>1.558</b> | 1  | <b>1.290</b> | 1  | 0.90 | <b>1.352</b> | 1  | 6.80  | 1.25  | 2   | 1  | 46.78   | 1.25  | 1  | 1 |
| CCAAT/enhancer binding protein, beta [Homo sapiens], C/EBPbeta                                       | 119596035 | 40.6  | 1.053 | 27 | <b>1.556</b> | 28 | <b>1.546</b> | 28 | 1.01 | <b>1.750</b> | 28 | 8.02  | 27.58 | 70  | 9  | 1373.71 | 26.32 | 34 | 8 |
| forkhead box M1 isoform 1 [Homo sapiens], FOXM1                                                      | 42544167  | 93.1  | 0.976 | 10 | <b>1.526</b> | 10 | <b>1.559</b> | 10 | 0.98 | <b>1.695</b> | 10 | 4.88  | 26.27 | 10  | 4  | 161.57  | 13.56 | 5  | 2 |
| nuclear transcription factor Y subunit alpha, isoform 1 [Homo sapiens], NFYA                         | 4505389   | 39.5  | 0.971 | 8  | <b>1.497</b> | 8  | <b>1.273</b> | 8  | 0.86 | <b>1.546</b> | 8  | 4.94  | 21.58 | 16  | 3  | 368.26  | 17.37 | 7  | 2 |
| YY1 transcription factor [Homo sapiens], YY1                                                         | 4507955   | 51.1  | 1.023 | 38 | <b>1.385</b> | 38 | <b>1.262</b> | 38 | 0.96 | <b>1.480</b> | 38 | 11.62 | 29.41 | 69  | 7  | 948.85  | 29.41 | 33 | 7 |
| histone deacetylase 2 [Homo sapiens], HDAC2                                                          | 46623327  | 137.9 | 1.084 | 21 | <b>1.350</b> | 21 | <b>1.531</b> | 21 | 0.88 | <b>1.558</b> | 21 | 6.98  | 27.53 | 33  | 7  | 579.47  | 25.00 | 17 | 6 |
| CCCTC-binding transcriptional repressor, isoform 1 [Homo sapiens], CTCF                              | 5729790   | 83.8  | 1.197 | 1  | <b>1.309</b> | 1  | <b>1.451</b> | 1  | 0.90 | <b>1.296</b> | 1  | 7.20  | 2.59  | 2   | 1  | 31.94   | 2.59  | 1  | 1 |
| general transcription factor IIB [Homo sapiens], GTF2B                                               | 4504193   | 38.8  | 1.229 | 2  | <b>0.744</b> | 2  | <b>0.638</b> | 2  | 0.89 | <b>0.594</b> | 2  | 9.76  | 10.88 | 2   | 2  | 57.71   | 6.22  | 1  | 1 |
| CREB-regulated transcription coactivator 2 [Homo sapiens], CTCR2                                     | 32171215  | 77.6  | 1.088 | 4  | <b>0.460</b> | 4  | <b>0.427</b> | 4  | 1.15 | <b>0.383</b> | 4  | 6.05  | 7.41  | 7   | 2  | 266.39  | 7.41  | 4  | 2 |
| Sp1 transcription factor [Homo sapiens], Sp1                                                         | 38372901  | 90.8  | 1.317 | 1  | <b>0.403</b> | 1  | <b>0.557</b> | 1  | 0.84 | <b>0.459</b> | 1  | 6.18  | 3.95  | 2   | 2  | 109.86  | 2.40  | 1  | 1 |
| Cbp/p300-interacting transactivator 2, isoform 1 [Homo sapiens], CITED2                              | 19923343  | 31.6  | 1.004 | 16 | <b>0.372</b> | 16 | <b>0.310</b> | 16 | 1.16 | <b>0.421</b> | 16 | 8.53  | 11.13 | 21  | 11 | 417.44  | 8.40  | 12 | 8 |
| transcription factor AP-2 alpha (activating enhancer binding protein 2 alpha) [Homo sapiens], TFAP2A | 109389358 | 45.3  | 1.049 | 1  | <b>0.219</b> | 1  | <b>0.293</b> | 1  | 0.94 | <b>0.258</b> | 1  | 7.75  | 3.01  | 2   | 1  | 51.61   | 3.01  | 1  | 1 |

| Description | Accession | MW [kDa] | AS: 114/113 | S: 114/113 | AS: 115/111 | S: 115/111 | AS: 116/113 | S: 116/111 | 115/116 | AS: 117/113 | S: 117/113 | pI | Coverad | EPMS | Peptide | Score A3 | Coverage A3 | PSM A3 | Peptides A |
|-------------|-----------|----------|-------------|------------|-------------|------------|-------------|------------|---------|-------------|------------|----|---------|------|---------|----------|-------------|--------|------------|
|-------------|-----------|----------|-------------|------------|-------------|------------|-------------|------------|---------|-------------|------------|----|---------|------|---------|----------|-------------|--------|------------|

Table SIV. Proteins interacting with the miR-630 promoter sequence in SCC cells (11/11M) upon cisplatin exposure

|                                                                         |           |      |       |    |              |    |              |    |      |              |    |      |       |    |    |         |        |    |   |
|-------------------------------------------------------------------------|-----------|------|-------|----|--------------|----|--------------|----|------|--------------|----|------|-------|----|----|---------|--------|----|---|
| tumor protein p63 [Homo sapiens], TP63                                  | 169234657 | 67.9 | 0.987 | 21 | <b>7.369</b> | 21 | <b>6.753</b> | 21 | 0.81 | <b>6.999</b> | 21 | 6.16 | 50.05 | 20 | 8  | 1529.55 | 49.01  | 19 | 7 |
| nuclear transcription factor Y, beta [Homo sapiens], NFYB               | 5453780   | 25.6 | 1.035 | 10 | <b>2.724</b> | 10 | <b>2.350</b> | 10 | 0.84 | <b>0.272</b> | 10 | 8.29 | 15.35 | 16 | 4  | 407.44  | 182.40 | 12 | 4 |
| CREB-regulated transcription coactivator 2 [Homo sapiens], CRTC2        | 32171215  | 77.5 | 0.753 | 6  | <b>2.171</b> | 6  | <b>2.078</b> | 6  | 0.90 | <b>2.463</b> | 6  | 8.66 | 3.02  | 12 | 2  | 221.79  | 1.51   | 5  | 1 |
| DNA damage-inducible transcript 3 [Homo sapiens], DDIT3                 | 304282231 | 20.3 | 0.974 | 2  | <b>2.107</b> | 2  | <b>1.971</b> | 2  | 1.00 | <b>2.142</b> | 2  | 4.92 | 1.25  | 20 | 3  | 285.28  | 1.00   | 9  | 2 |
| heat shock transcription factor 1 [Homo sapiens], HSF1                  | 15779147  | 59.5 | 0.974 | 2  | <b>1.865</b> | 2  | <b>1.471</b> | 2  | 1.00 | <b>1.544</b> | 2  | 4.92 | 1.25  | 2  | 3  | 285.28  | 1.00   | 9  | 2 |
| transcription factor Sp1, isoform a [Homo sapiens], SP1                 | 38372901  | 92.4 | 0.953 | 7  | <b>1.724</b> | 7  | <b>1.325</b> | 7  | 0.93 | <b>1.537</b> | 7  | 6.92 | 10.61 | 13 | 2  | 173.50  | 10.61  | 6  | 2 |
| transcription factor AP-2alpha, isoform a [Homo sapiens], TFAP2A        | 4507441   | 48.5 | 1.053 | 27 | <b>1.596</b> | 28 | <b>1.246</b> | 28 | 1.01 | <b>1.250</b> | 28 | 8.02 | 27.58 | 30 | 9  | 1373.71 | 26.32  | 34 | 8 |
| v-myb myeloblastosis virus oncogene homolog [Homo sapiens], c-MYB       | 71682821  | 69.8 | 0.916 | 1  | <b>1.538</b> | 1  | <b>1.411</b> | 1  | 0.83 | <b>1.352</b> | 1  | 7.01 | 49.03 | 1  | 1  | 3911.15 | 38.41  | 1  | 1 |
| general transcription factor IIB [Homo sapiens], GTF2B                  | 18088837  | 36.5 | 0.953 | 6  | <b>1.417</b> | 6  | <b>1.380</b> | 6  | 0.90 | <b>1.463</b> | 6  | 8.66 | 3.02  | 12 | 2  | 221.79  | 1.51   | 5  | 1 |
| histone acetyltransferase, KAT2B [Homo sapiens], KAT2B                  | 40805843  | 94.6 | 0.982 | 1  | <b>1.392</b> | 1  | <b>1.473</b> | 1  | 1.02 | <b>1.432</b> | 1  | 4.67 | 6.79  | 5  | 6  | 712.45  | 6.56   | 3  | 2 |
| Cbp/p300-interacting transactivator 2 isoform 1 [Homo sapiens], CITED2  | 19923343  | 31.6 | 0.968 | 1  | <b>1.358</b> | 1  | <b>1.276</b> | 1  | 1.15 | <b>1.276</b> | 1  | 6.13 | 3.15  | 2  | 1  | 66.61   | 3.15   | 1  | 1 |
| TATA-binding protein-like protein 1 [Homo sapiens], TBPL1               | 358439409 | 21.6 | 0.905 | 3  | <b>1.247</b> | 3  | <b>1.329</b> | 3  | 1.10 | <b>1.555</b> | 3  | 5.12 | 5.14  | 4  | 2  | 84.19   | 2.86   | 1  | 1 |
| activating transcription factor 2 [Homo sapiens], ATF2                  | 120660330 | 57.8 | 0.933 | 2  | <b>1.228</b> | 2  | <b>1.248</b> | 2  | 0.81 | <b>1.530</b> | 2  | 7.03 | 51.92 | 4  | 4  | 5402.07 | 51.92  | 4  | 4 |
| C-terminal-binding protein 1 isoform 1 [Homo sapiens], CTBP1            | 4557497   | 48.3 | 0.913 | 1  | <b>0.525</b> | 1  | <b>0.428</b> | 1  | 0.90 | <b>0.562</b> | 1  | 9.28 | 35.37 | 4  | 2  | 148.28  | 35.37  | 3  | 2 |
| histone deacetylase 1 [Homo sapiens], HDAC1                             | 49456395  | 53.6 | 0.904 | 16 | <b>0.347</b> | 16 | <b>0.390</b> | 16 | 1.16 | <b>0.472</b> | 16 | 8.53 | 11.13 | 16 | 11 | 417.44  | 8.40   | 12 | 8 |
| histone-lysine N-methyltransferase EZH2 isoform b [Homo sapiens], EZH2  | 23510384  | 78.3 | 0.913 | 11 | <b>0.327</b> | 11 | <b>0.353</b> | 11 | 1.02 | <b>0.343</b> | 11 | 6.32 | 10.25 | 10 | 8  | 549.55  | 9.21   | 9  | 7 |
| SIN3 homolog B, transcription regulator [Homo sapiens], SIN3B           | 84569981  | 40.8 | 1.189 | 4  | <b>0.315</b> | 3  | <b>0.344</b> | 3  | 1.12 | <b>0.379</b> | 3  | 4.81 | 6.56  | 5  | 1  | 84.39   | 6.56   | 2  | 1 |
| CCCTC-binding transcriptional repressor, isoform 1 [Homo sapiens], CTCF | 5729790   | 80.8 | 0.948 | 3  | <b>0.280</b> | 14 | <b>0.319</b> | 14 | 1.97 | <b>0.302</b> | 14 | 6.07 | 12.45 | 12 | 7  | 354.67  | 11.45  | 24 | 9 |

| Description8                                                                                                       | Accession | MW [kDa] | AS: 114/113 | 5: 114/113 | AS: 115/111  | 5: 115/111 | AS: 116/113  | 5: 116/111 | 115/116 | AS: 117/113  | 5: 117/113 | pI   | Coverage | PSMs | Peptide | Score A3 | Coverage A3 | PSM A3 | Peptides A3 |
|--------------------------------------------------------------------------------------------------------------------|-----------|----------|-------------|------------|--------------|------------|--------------|------------|---------|--------------|------------|------|----------|------|---------|----------|-------------|--------|-------------|
| Table SV. Proteins interacting with the miR-885-3p promoter sequence in SCC cells (11/11M) upon cisplatin exposure |           |          |             |            |              |            |              |            |         |              |            |      |          |      |         |          |             |        |             |
| tumor protein p63 [Homo sapiens], TP63                                                                             | 169234657 | 67.9     | 1.009       | 11         | <b>6.371</b> | 11         | <b>7.278</b> | 11         | 1.19    | <b>7.146</b> | 11         | 6.36 | 1.79     | 12   | 11      | 121.89   | 1.81        | 11     | 10          |
| histone acetyltransferase, EP300 [Homo sapiens], KAT3B                                                             | 50345997  | 271.3    | 1.013       | 1          | <b>2.757</b> | 1          | <b>2.828</b> | 1          | 1.02    | <b>2.328</b> | 1          | 5.76 | 5.33     | 2    | 2       | 108.85   | 5.39        | 3      | 2           |
| Cbp/p300-interacting transactivator 2 isoform 1 [Homo sapiens], CITED2                                             | 19923343  | 31.6     | 1.018       | 1          | <b>2.135</b> | 1          | <b>2.086</b> | 1          | 0.97    | <b>2.065</b> | 10         | 6.62 | 22.65    | 1    | 1       | 504.31   | 18.58       | 1      | 1           |
| CREB-regulated transcription coactivator 2 [Homo sapiens], CRTC2                                                   | 32171215  | 77.5     | 0.908       | 6          | <b>1.942</b> | 6          | <b>1.813</b> | 6          | 1.16    | <b>1.629</b> | 6          | 7.96 | 8.82     | 7    | 4       | 137.17   | 8.82        | 4      | 4           |
| TATA-binding protein-like protein 1 [Homo sapiens], TBPL1                                                          | 358439409 | 20.5     | 0.976       | 24         | <b>1.931</b> | 24         | <b>1.558</b> | 24         | 1.00    | <b>1.719</b> | 24         | 7.55 | 16.96    | 42   | 11      | 1010.36  | 14.80       | 18     | 8           |
| c-Rel homolog [Homo sapiens], c-REL                                                                                | 219518044 | 65.4     | 1.149       | 5          | <b>1.833</b> | 5          | <b>1.609</b> | 5          | 0.87    | <b>1.420</b> | 5          | 5.40 | 15.43    | 35   | 7       | 655.12   | 15.43       | 17     | 7           |
| transcription factor Sp3, isoform 1 [Homo sapiens], SP3                                                            | 38373693  | 88.5     | 0.929       | 16         | <b>1.794</b> | 15         | <b>1.750</b> | 15         | 1.08    | <b>1.649</b> | 16         | 5.66 | 17.84    | 48   | 14      | 1042.57  | 14.71       | 20     | 10          |
| transcription factor AP2alpha, isoform a [Homo sapiens], TFAP2A                                                    | 4507441   | 49.5     | 1.071       | 6          | <b>1.766</b> | 6          | <b>1.676</b> | 6          | 1.07    | <b>1.685</b> | 6          | 8.18 | 4.86     | 6    | 2       | 50.73    | 2.16        | 1      | 1           |
| general transcription factor 2B [Homo sapiens], GTF2B                                                              | 4504193   | 36.6     | 0.991       | 4          | <b>1.573</b> | 4          | <b>1.629</b> | 4          | 0.91    | <b>1.675</b> | 4          | 8.60 | 3.06     | 7    | 3       | 186.38   | 2.46        | 3      | 2           |
| activating transcription factor 2 [Homo sapiens], ATF2                                                             | 120660330 | 56.5     | 0.988       | 40         | <b>1.351</b> | 40         | <b>1.376</b> | 40         | 0.92    | <b>1.331</b> | 40         | 9.38 | 15.32    | 72   | 16      | 1292.39  | 13.47       | 36     | 13          |
| DNA-damage-inducible transcript 3 [Homo sapiens], DDIT3                                                            | 304282231 | 20.6     | 0.915       | 6          | <b>1.311</b> | 6          | <b>1.343</b> | 6          | 0.86    | <b>1.372</b> | 6          | 5.19 | 17.05    | 8    | 5       | 200.39   | 17.05       | 5      | 5           |
| nuclear transcription factor Y, beta [Homo sapiens], NFYB                                                          | 5453780   | 22.7     | 0.908       | 5          | <b>1.299</b> | 5          | <b>1.337</b> | 5          | 0.95    | <b>1.510</b> | 5          | 6.34 | 27.78    | 9    | 1       | 1590.80  | 27.78       | 4      | 1           |
| histone-lysine N-methyltransferase EZH2 isoform a [Homo sapiens], EZH2                                             | 21361095  | 83.3     | 0.913       | 11         | <b>0.567</b> | 11         | <b>0.653</b> | 11         | 1.02    | <b>0.430</b> | 11         | 6.32 | 10.25    | 10   | 8       | 549.55   | 9.21        | 9      | 7           |
| histone deacetylase 4 [Homo sapiens], HDAC4                                                                        | 153085395 | 117.6    | 0.753       | 6          | <b>0.337</b> | 6          | <b>0.278</b> | 6          | 0.90    | <b>0.463</b> | 6          | 8.66 | 3.02     | 12   | 2       | 221.79   | 1.51        | 5      | 1           |
| C-terminal-binding protein 1 isoform 1 [Homo sapiens], CTBP1                                                       | 4557497   | 48.3     | 1.091       | 1          | <b>0.257</b> | 1          | <b>0.283</b> | 1          | 0.90    | <b>0.328</b> | 1          | 9.28 | 35.37    | 4    | 2       | 148.28   | 35.37       | 3      | 2           |
| SIN3 homolog B, transcription regulator [Homo sapiens], SIN3B                                                      | 84569981  | 40.8     | 0.989       | 6          | <b>0.239</b> | 4          | <b>0.214</b> | 4          | 0.92    | <b>0.279</b> | 4          | 4.81 | 8.16     | 5    | 2       | 45.39    | 8.16        | 4      | 2           |
